# Supplementary material
Source: publisher site journal article supplement (https://www.dovepress.com/get_supplementary_file.php?f=430552.docx)
Supplement: Supplementary file 1 [file get_supplementary_file.php]

**Supplementary Table 1. The Association of Dermatoses with Some Aging-Associated Disorders**

| **Dermatoses** | | | **Number of Cases** | | **Aging-Associated Disorders** | | **%/Odds Ratio/Hazard Ratio/Prevalence (95% CI)** | | **References** | |
| --- | --- | --- | --- | --- | --- | --- | --- | --- | --- | --- |
| ***Atopic Dermatitis*** | | | | | | | | | | |
|  | | | 4789 subjects | | Coronary artery disease | | aOR 1.96 (1.02-3.77) p=0.04 | | 1 | |
| 22234 subjects | | Coronary artery disease | | aOR 1.38(1.12-1.7) p=0.003 | | 1 | |
| 32060 subjects | | Coronary artery disease | | aOR 1.32(1.04-1.66) p=0.02 | | 1 | |
| 29304 subjects | | Coronary artery disease | | 4.8% vs. 5.5%, p=0.2 | | 2 | |
| 20323 controls,  20323 cases | | Coronary artery disease | | HR 6.26 (4.33-9.05) p<0.001 | | 3 | |
| 72651487 subjects | | Coronary artery disease | | Propensity OR 0.67 (0.66-0.69) p<0.0001 | | 4 | |
| 353743 controls, 39779 cases | | Coronary artery disease | | OR 1.23(1.16-1.30) p<0.05 | | 5 | |
| 4796 subjects | | Angina | | aOR 1.35 (0.55-3.28) p=0.51 | | 1 | |
|  | | | 22241 subjects | | Angina | | aOR 1.73 (1.21-1.31) p=0.0002 | | 1 | |
|  | | | 32059 subjects | | Angina | | aOR 1.77 (1.20-2.61) p=0.004 | | 1 | |
|  | | | 29304 subjects | | Angina | | 1.4% vs. 2.4%, p=0.0004 | | 2 | |
|  | | | 353743 controls, 39779 cases | | Angina | | OR 1.33(1.19-1.48) p<0.05 | | 5 | |
|  | | | 1528477 controls, 387439 cases | | Angina | | HR 1.17 (1.03-1.32) | | 6 | |
|  | | | 1,022,435 controls, 104,832 cases | | Angina | | aOR 1.13(1.08-1.19) p<0.05 | | 7 | |
|  | | | 1437112 controls, 290996 cases | | Angina | | aHR 5.99 (4.96-7.25) p<0.0001 | | 8 | |
|  | | | 40512 controls, 40512 cases | | Angina | | aHR 1.49(1.36-1.63) p<0.0001 | | 9 | |
|  | | |  | |  | |  | |  | |
|  | | | 500000 subjects | | Angina | | aOR 1.0(0.92-1.10) p=0.096 | | 10 | |
|  | | | 4797 subjects | | Heart attach | | aOR 1.98 (0.96-4.12) p=0.07 | | 1 | |
|  | | | 22262 subjects | | Heart attach | | aOR 1.48 (1.15-1.90) p=0.002 | | 1 | |
|  | | | 32087 subjects | | Heart attach | | aOR 1.26 (0.96-1.64) p=0.1 | | 1 | |
|  | | | 4804 subjects | | Heart failure | | aOR 1.1 (0.4-2.57) p=0.99 | | 1 | |
|  | | | 1528477 controls, 387439 cases | | Heart failure | | HR 1.17 (1.08-1.28) | | 6 | |
|  | | | 4802 subjects | | Stroke | | aOR 0.61 (0.21-1.80) p=0.37 | | 1 | |
|  | | | 22262 subjects | | Stroke | | aOR 1.39 (1.05-1.83) p=0.02 | | 1 | |
|  | | | 32084 subjects | | Stroke | | aOR 1.7 (1.33-2.25) p<0.0001 | | 1 | |
|  | | | 1528477 controls, 387439 cases | | Stroke | | HR 1.08 (1.00-1.16) | | 6 | |
|  | | | 1,022,435 controls, 104,832 cases | | Stroke | | aOR 1.04(0.99-1.09) p>0.05 | | 7 | |
|  | | | 40512 controls, 40512 cases | | Stroke | | aHR 1.80(1.18-1.44) p<0.0001 | | 9 | |
|  | | | 145372 controls, 26898 mild & 257 severe cases | | Stroke | | Adjusted IRR 0.82 (0.68-0.98) p<0.05 (mild AD)  Adjusted IRR 1.19 (0.95-1.65) p=0.317 (severe AD) | | 11 | |
|  | | | 259119 subjects | | Stroke | | aOR 0.75 (0.62-0.89) | | 12 | |
|  | | | 79370 controls, 7937 cases | | Stroke | | aOR 1.52(1.32-1.74) p<0.0001 | | 13 | |
|  | | | 29304 subjects | | Myocardial infarction | | 3.0% vs. 3.1%, p=0.8 | | 2 | |
|  | | | 72651487 subjects | | Myocardial infarction | | Propensity OR 0.52 (0.49-0.55) p<0.0001 | | 4 | |
|  | | | 353743 controls, 39779 cases | | Myocardial infarction | | OR 1.16(0.99-1.37) p=0.646 | | 5 | |
|  | | | 1528477 controls, 387439 cases | | Myocardial infarction | | HR 1.06 (0.98-1.15) | | 6 | |
|  | | | 1,022,435 controls, 104,832 cases | | Myocardial infarction | | aOR 1.07(1.02-1.12) p<0.05 | | 7 | |
|  | | | 1437112 controls, 290996 cases | | Myocardial infarction | | aHR 9.43 (7.28-12.20) p<0.0001 | | 8 | |
|  | | | 40512 controls, 40512 cases | | Myocardial infarction | | aHR 1.40(1.15-1.70) p=0.0009 | | 9 | |
|  | | | 500000 subjects | | Myocardial infarction | | aOR 0.91(0.81-1.03) p=0.15 | | 10 | |
|  | | | 145372 controls, 26898 mild & 257 severe cases | | Myocardial infarction | | Adjusted IRR 0.73 (0.59-0.91) p<0.05 (mild AD)  Adjusted IRR 1.06 (0.72-1.56) p=0.761(severe AD) | | 11 | |
|  | | | 259119 subjects | | Myocardial infarction | | aOR 0.80 (0.69-0.92) | | 12 | |
|  | | 79370 controls, 7937 cases | | Myocardial infarction | | aOR 1.10(0.92-1.33) p=0.2982 | | 13 | |
|  | | 48396 controls, 4814 cases | | Myocardial infarction | | aHR 1.74(1.21-2.49) | | 14 | |
|  | | 2678888 controls, 625083 cases | | Myocardial infarction | | HR 1.00(0.97-1.02) (overall AD)  HR 1.27(1.15-1.39) (severe AD) | | 15 | |
|  | | 3825609 controls, 22183 mild &  34022 moderate-to-severe cases | | Myocardial infarction | | aHR 1.11(1.05-1.18) (overall AD)  aHR 1.04(0.96-1.14) (mild AD)  aHR 1.16 (1.08-1.25) (moderate-severe AD) | | 16 | |
|  | | 1278 subjects | | Heart disease | | Adjusted RRR 2.01 (1.24-2.78) p=0.0004 | | 17 | |
|  | | 397380 controls, 132460 cases | | Major adverse cardiovascular events | | OR 1.40 (1.34-1.45) | | 18 | |
|  | | 4263 controls, 619 cases | | Cardiovascular events | | aOR 1.03 (0.74-1.43) p=0.8489 | | 19 | |
|  | | 29304 subjects | | Hypertension | | 31.3% vs. 31.6%, p=0.8 | | 2 | |
|  | | 20323 controls, 20323 cases | | Hypertension | | HR 9.69 (7.68-11.75) p<0.001 | | 3 | |
|  | | 72651487 subjects | | Hypertension | | Propensity OR 1.05 (1.03-1.07) p<0.0001 | | 4 | |
|  | | 353743 controls, 39779 cases | | Hypertension | | OR 1.27(1.24-1.30) p<0.05 | | 5 | |
|  | | 929422 controls, 95274 Non severe cases | | Hypertension | | 8.3% vs. 8.8%, p<0.001 | | 7 | |
|  | | 93013 controls, 9558 severe cases | | Hypertension | | 16.4% vs. 21%, p<0.001 | | 7 | |
|  | | 1437112 controls, 290996 cases | | Hypertension | | aHR 4.86 (1.65-5.09) p<0.0001 | | 8 | |
|  | | 259119 subjects | | Hypertension | | aOR 0.85 (0.81-0.88) | | 12 | |
|  | | 79370 controls, 7937 cases | | Hypertension | | aOR 1.09(1.01-1.19) p=0.0332 | | 13 | |
|  | | 2678888 controls, 625083 cases | | Hypertension | | HR 0.98(0.97-0.99) (overall AD)  HR 1.05(1.01-1.10) (severe AD) | | 15 | |
|  | | 1278 subjects | | Hypertension | | Adjusted RRR 1.01 (0.90-1.13) p=0.82 | | 17 | |
|  | | 10077 moderate to severe cases | | Hypertension | | aOR 1.15 (1.16-2.34) p=0.03 | | 20 | |
|  | | 35229 controls, 35229 cases | | Hypertension | | 6.56% vs. 15.10%, p<0.001 | | 21 | |
|  | | 45157 controls, 45157 cases | | Hypertension | | aOR 1.01(0.95-1.05) p=0.935 | | 22 | |
|  | | 25955 controls, 3756 mild &  419 severe cases | | Hypertension | | aOR1.16(1.06-1.26) (mild AD)  aOR1.76(1.36-2.29) (severe AD) | | 23 | |
|  | | 20012 subjects | | Hypertension | | aOR 1.52(1.24-1.87) p<0.0001 | | 24 | |
|  | | 500000 subjects | | Hypertension | | aOR 0.95(0.91-0.99) p=0.024 | | 10 | |
|  | | 353743 controls, 39779 cases | | Cerebrovascular accident | | OR 1.31(1.21-1.41) p<0.05 | | 5 | |
|  | | 2678888 controls, 625083 cases | | Cerebrovascular accident | | HR 1.04(1.02-1.06) (overall AD)  HR 1.21(1.13-1.30) (severe AD) | | 15 | |
|  | | 29304 subjects | | Diabetes mellitus | | 9.5% vs. 10.4%, p=0.2 | | 2 | |
|  | | 20323 controls, 20323 cases | | Diabetes mellitus | | HR 4.22(3.55-5.02) p<0.001 | | 3 | |
|  | | 72651487 subjects | | Type 2 Diabetes | | Propensity OR 0.88 (0.83-0.93) p<0.0001 | | 4 | |
|  | | 353743 controls, 39779 cases | | Type 2 Diabetes | | OR 1.19(1.15-1.23) p<0.05 | | 5 | |
|  | | 929422 controls, 95274 Non severe cases | | Diabetes mellitus | | 3.5% vs. 3.4%, p=0.146 | | 7 | |
|  | | 93013 controls, 9558 severe cases | | Diabetes mellitus | | 6.3% vs. 7.9%, p<0.001 | | 7 | |
|  | | 1437112 controls, 290996 cases | | Type 2 diabetes | | aHR 2.96 (2.56-3.41) p<0.0001 | | 8 | |
|  | | 259119 subjects | | Type 2 diabetes | | aOR 0.74(0.68-0.80) | | 12 | |
|  | | 79370 controls, 7937 cases | | Diabetes mellitus | | aOR 0.81(0.72-0.91) p=0.0005 | | 13 | |
|  | | 2678888 controls, 625083 cases | | Diabetes mellitus | | HR 1.05(1.03-1.06) (overall AD)  HR 1.15(1.09-1.22) (severe AD) | | 14 | |
|  | | 1278 subjects | | Diabetes mellitus | | Adjusted RRR 1.31 (0.96-1.67) p=0.08 | | 17 | |
|  | | 10077 moderate to severe AD | | Type 2 diabetes | | aOR 5.62 (2.15-14.6) p<0.001 | | 20 | |
|  | | 35229 controls, 35229 cases | | Diabetes mellitus | | 4.17% vs. 9.65%, p<0.001 | | 21 | |
|  | | 45157 controls, 45157 cases | | Diabetes mellitus | | aOR 0.94(0.89-0.98) p=0.011 | | 22 | |
|  | | 25955 controls, 3756 mild &  419 severe cases | | Type 2 diabetes | | aOR1.34(1.23-1.47) (mild AD)  aOR2.01(1.60-2.53) (severe AD) | | 23 | |
|  | | 20012 subjects | | Diabetes mellitus | | aOR 1.22(0.90-1.64) p=0.1931 | | 24 | |
|  | | 500000 subjects | | Diabetes mellitus | | aOR 0.75(0.67-0.84) p<0.001 | | 10 | |
|  | | 36692 controls, 36692 cases | | Type 2 diabetes | | aHR 1.44 (1.27-1.64) p<0.001 | | 25 | |
|  | | 20323 controls, 20323 cases | | Dyslipidemia | | HR 3.38(2.85-4.01) p<0.001 | | 3 | |
|  | | 353743 controls, 39779 cases | | Hyperlipidemia | | OR 1.37(1.34-1.40) p<0.05 | | 5 | |
|  | | 929422 controls, 95274 Non severe cases | | Hyperlipidemia | | 2.6% vs. 2.8%, p=0.001 | | 7 | |
|  | | 93013 controls, 9558 severe cases | | Hyperlipidemia | | 5.0% vs. 6.0%, p<0.001 | | 7 | |
|  | | 1437112 controls, 290996 cases | | Hyperlipidemia | | aHR 33.02 (32.37-33.69) p<0.0001 | | 8 | |
|  | | 2678888 controls, 625083 cases | | Dyslipidemia | | HR 1.03(1.02-1.04) (overall AD)  HR 1.11(1.06-1.17) (severe AD) | | 15 | |
|  | | 10077 moderate to severe AD | | Hyperlipidemia | | aOR 1.51 (1.13-2.02) p=0.03 | | 20 | |
|  | | 35229 controls, 35229 cases | | Hyperlipidemia | | 9.56% vs. 20.76%, p<0.001 | | 21 | |
|  | | 45157 controls, 45157 cases | | Dyslipidemia | | aOR 1.14(1.09-1.19) p<0.001 | | 22 | |
|  | | 20012 subjects | | Dyslipidemia | | aOR 1.65(1.33-2.04) p<0.0001 | | 24 | |
|  | | 353743 controls, 39779 cases | | Metabolic syndrome | | OR 1.47(1.33-1.62) p<0.05 | | 5 | |
|  | | 45157 controls, 45157 cases | | Metabolic syndrome | | aOR 0.88(0.85-0.95) p<0.001 | | 22 | |
|  | | 5007 subjects | | Metabolic syndrome | | aOR 2.82(1.45-5.52) p=0.02 (females)  aOR 0.75(0.34-1.66) p=0.11 (males) | | 26 | |
|  | | 353743 controls, 39779 cases | | Osteoporosis | | OR 1.43(1.32-1.54) p<0.05 | | 5 | |
|  | | 35229 controls, 35229 cases | | Osteoporosis | | 0.36% vs. 1.02%, p<0.001 | | 21 | |
| ***Psoriasis*** | | | | | | | | | | |
|  | | 72651487 subjects | | Coronary artery disease | | Propensity OR 0.86 (0.85-0.88) p<0.001 | | 4 | |
|  | | 1044 controls,581 cases | | Coronary artery disease | | OR 1.77, p<0.01 | | 27 | |
|  | | 500000 subjects | | Heart failure | | aOR 1.19(1.03-1.39) p=0.022 | | 10 | |
|  | | 1044 controls,581 cases | | Hypertension | | OR 3.27, p<0.0001 | | 27 | |
|  | | 82456 controls, 20614 cases | | Heart failure | | OR 1.21(1.12-1.30) | | 28 | |
|  | | 101507 controls, 25556 cases | | Heart failure | | OR 1.22(1.10-1.35) | | 28 | |
|  | | 36992 controls, 34371 mild and 2621 severe cases | | Heart failure | | 0.09%(control), 0.10% (mild) and 0.15% (severe) | | 29 | |
|  | | 208187 controls, 48523 cases | | Heart failure | | aOR 1.57(1.39-1.78) p<0.001 | | 30 | |
|  | | 500000 subjects | | Angina | | aOR 1.17(1.04-1.31) p=0.007 | | 10 | |
|  | | 1727832 controls, 5788 cases | | Angina | | OR 1.32(1.17-1.50) (mild)  OR 1.38(1.06-1.79) (moderate to severe) | | 31 | |
|  | | 97 controls, 97 cases | | Angina | | OR 2.50(1.04-6.15) p=0.03 | | 32 | |
|  | | 72651487 subjects | | Myocardial infarction | | Propensity OR 0.77 (0.74-0.80) p<0.0001 | | 4 | |
|  | | 500000 subjects | | Myocardial infarction | | aOR 1.25(1.08-1.44) p=0.003 | | 10 | |
|  | | 82456 controls, 20614 cases | | Myocardial infarction | | OR 1.22(1.08-1.39) | | 28 | |
|  | | 101507 controls, 25556 cases | | Myocardial infarction | | OR 1.07(0.92-1.23) | | 28 | |
|  | | 1727832 controls, 5788 cases | | Myocardial infarction | | OR 0.96(0.72-1.26) (mild)  OR 2.24(1.51-3.32) (moderate to severe) | | 31 | |
|  | | 556995 controls, 127139 mild and 3837 severe cases | | Myocardial infarction | | OR 3.24(3.27-3.41) (mild) p<0.001  OR 3.31(3.13-3.51) (moderate to severe) p<0.001 | | 33 | |
|  | | 93545 controls, 2463 cases | | Myocardial infarction | | aHR 1.70 (1.01-2.86) | | 34 | |
|  | | 19065 controls, 520 cases | | Myocardial infarction | | aOR 2.27 (1.27-3.95) p=0.005 | | 35 | |
|  | | 81573 controls, 138424 cases | | Myocardial infarction | | aOR 1.08 (0.98-1.18) | | 36 | |
|  | | 72651487 subjects | | Hypertension | | Propensity OR 1.23 (1.21-1.25) p<0.0001 | | 4 | |
|  | | 20012 subjects | | Hypertension | | aOR 1.41(1.16-1.70) p=0.0005 | | 24 | |
|  | | 500000 subjects | | Hypertension | | aOR 1.02(0.95-1.10) p=0.53 | | 10 | |
|  | | 82456 controls, 20614 cases | | Hypertension | | OR 1.14(1.10-1.17) | | 28 | |
|  | | 101507 controls, 25556 cases | | Hypertension | | OR 1.20(1.17-1.24) | | 28 | |
|  | | 208187 controls, 48523 cases | | Hypertension | | aOR 1.37(1.29-1.45) p<0.001 | | 30 | |
|  | | 97 controls, 97 cases | | Hypertension | | Vs. controls, P=0.007 | | 32 | |
|  | | 556995 controls, 127139 mild and 3837 severe cases | | Hypertension | | OR 1.11(1.07-1.16) (mild) p<0.001  OR 1.12(1.07-1.17) (moderate to severe)p<0.001 | | 33 | |
|  | | 1079 AD (as controls), 1079 psoriasis | | Hypertension | | OR 1.42 (1.20-1.69) p<0.001 (AD vs. psoriasis) | | 37 | |
|  | | 48677 controls, 16850 cases | | Hypertension | | aOR 1.3(1.20-1.50) | | 38 | |
|  | | 4244 controls, 1061 cases | | Hypertension | | aOR 1.93 (1.64-2.28) | | 39 | |
|  | | 190 cases | | Hypertension | | 43.7% | | 40 | |
|  | | 465252 controls, 127706 mild cases | | Hypertension | | aOR 1.03 (1.01-1.06) | | 41 | |
|  | | 14065 controls, 3854 severe cases | | Hypertension | | aOR 1.0 (0.87-1.14) | | 41 | |
|  | | Unspecified number of general populations, 190 cases | | Hypertension | | 22.7% vs. 43.7% | | 42 | |
|  | | 40 cases | | Hypertension | | 35% | | 43 | |
|  | | 391833 controls, 6868 severe cases | | Hypertension | | OR 1.93 (1.83-2.03)p<0.001 | | 44 | |
|  | | 2201 cases | | Hypertension | | 26% | | 45 | |
|  | | 401 controls, 197 cases | | Hypertension | | 13.7% vs. 32.5%, p=0.000 | | 46 | |
|  | | 3147 controls, 3147 cases | | Hypertension | | aOR 1.34(1.18-1.51) p<0.001 | | 47 | |
|  | | 682 controls. 490 cases | | Hypertension | | 17.3% vs. 14.1%, p=0.169 | | 48 | |
|  | | 140 controls, 140 cases | | Hypertension | | OR 2.41(1.47-3.95) p<0.001 | | 49 | |
|  | | 163 controls, 244 cases | | Hypertension | | aOR 3.81(2.30-6.31) | | 50 | |
|  | | 40650 controls, 2044 mild,1377 moderate & 475 severe cases | | Hypertension | | aOR 1.03(0.89-1.20) (mild)  aOR 1.02(0.85-1.24) (moderate)  aOR 1.32(0.91-1.92) (severe) | | 51 | |
|  | | 2385 controls, 71 cases | | Hypertension | | aOR 1.33(0.63-2.79) | | 52 | |
|  | | 300 controls, 304 cases | | Hypertension | | OR 2.20(1.20-4.60) p=0.003 | | 53 | |
|  | | 661 controls,661 cases | | Hypertension | | OR 1.60(1.24-2.07) p<0.001 | | 54 | |
|  | | 81 controls,77 cases | | Hypertension | | OR 2.19(1.05-4.58) p=0.04 | | 55 | |
|  | | 120 controls,118 cases | | Hypertension | | 22.5% vs. 30.5%. p=0.162 | | 56 | |
|  | | 95 controls,95 cases | | Hypertension | | OR 4.21(1.49-11.86) p=0.004 | | 57 | |
|  | | 1718 controls,859 cases | | Hypertension | | OR 1.02(0.84-1.25) p=0.8373 | | 58 | |
|  | | 154 controls,151 cases | | Hypertension | | OR 1.12(1.20-3.75) | | 59 | |
|  | | 4263 controls, 1521 cases | | Cardiovascular diseases | | aOR 1.09 (0.89-1.33)p=0.4210 | | 19 | |
|  | | 82456 controls, 20614 cases | | Cardiovascular diseases | | OR 1.13(1.06-1.20) | | 28 | |
|  | | 101507 controls, 25556 cases | | Cardiovascular diseases | | OR 1.18(1.09-1.28) | | 28 | |
|  | | 93545 controls, 2463 cases | | Cardiovascular diseases | | aHR 1.55 (1.04-2.31) | | 34 | |
|  | | 1079 AD (as controls),1079 psoriasis | | Cardiovascular diseases | | OR 1.34 (1.13-1.59) p=0.001 (AD vs. psoriasis) | | 37 | |
|  | | 401 controls, 197 cases | | Cardiovascular diseases | | 1.7% vs. 406%, p=0.044 | | 46 | |
|  | | 1579037 controls, 46095 cases | | Atherosclerosis | | OR 1.28, p<0.05 | | 41 | |
|  | | 19065 controls, 520 cases | | Ischemic heart disease | | aOR 1.90(1.18-3.05) p=0.008 | | 35 | |
|  | | 154 controls,151 cases | | Ischemic heart disease | | OR 5.39(1.79-16.3) | | 59 | |
|  | | 72651487 subjects | | Cerebrovascular diseases | | Propensity OR 0.77 (0.74-0.80) p<0.0001 | | 4 | |
|  | | 391833 controls, 6868 severe cases | | Cerebrovascular diseases | | OR 1.55 (1.29-1.86)p<0.001 | | 44 | |
|  | | 154 controls,151 cases | | Cerebrovascular diseases | | OR 1.81(0.69-4.74) | | 59 | |
|  | | 1727832 controls, 5788 cases | | Stroke | | OR 1.09(0.97-1.23) (mild)  OR 1.23(0.96-1.59) (moderate to severe) | | 31 | |
|  | | 93545 controls, 2463 cases | | Stroke | | aHR 1.45 (0.8-2.65) | | 34 | |
|  | | 19065 controls, 520 cases | | Stroke | | aOR 1.01 (0.48-2.16) p=0.744 | | 35 | |
|  | | 81573 controls, 138424 cases | | Stroke | | aOR 1.08 (0.99-1.17) | | 36 | |
|  | | 72651487 subjects | | Type 2 diabetes | | Propensity OR 0.99 (0.95-1.04) p=0.7366 | | 4 | |
|  | | 500000 subjects | | Diabetes mellitus | | aOR 1.13(0.97-1.29) p=0.079 | | 10 | |
|  | | 20012 subjects | | Diabetes mellitus | | aOR 1.42(1.11-1.83) p=0.0059 | | 24 | |
|  | | 1044 controls,581 cases | | Diabetes mellitus | | OR 2.48, p<0.0001 | | 27 | |
|  | | 82456 controls, 20614 cases | | Type 2 diabetes | | OR 1.20(1.14-1.25) | | 28 | |
|  | | 101507 controls, 25556 cases | | Type 2 diabetes | | OR 1.27(1.21-1.33) | | 28 | |
|  | | 208187 controls, 48523 cases | | Diabetes mellitus | | aOR 1.18(1.06-1.31) p=0.002 | | 30 | |
|  | | 556995 controls, 127139 mild and 3837 severe cases | | Diabetes mellitus | | OR 1.61(1.53-1.70) (mild) p<0.001  OR 1.62(1.53-1.71) (moderate to severe)p<0.001 | | 33 | |
|  | | 1079 AD (as controls), 1079 psoriasis | | Diabetes mellitus | | OR 1.60 (1.32-1.95) p<0.001 (AD vs. psoriasis) | | 37 | |
|  | | 48677controls, 16850 cases | | Diabetes mellitus | | aOR 1.320(1.00-1.30) | | 37 | |
|  | | 4244 controls, 1061 cases | | Diabetes mellitus | | aOR 1.31(1.13-1.51) (overall)  aOR 1.24(1.03-1.51) (<2-year history)  aOR 1.35(1.14-1.60) (≥2-year history) | | 39 | |
|  | | 190 cases | | Type 2 diabetes | | 15.3% | | 40 | |
|  | | 465252 controls, 127706 mild cases | | Diabetes mellitus | | aOR 1.13 (1.08-1.18) | | 41 | |
|  | | 14065 controls, 3854 severe cases | | Diabetes mellitus | | aOR 1.62(1.30-2.01) | | 41 | |
|  | | Unspecified number of general populations, 190 cases | | Diabetes mellitus | | 5.6% vs. 15.3% | | 42 | |
|  | | 40 cases | | Type 2 diabetes | | 10% | | 43 | |
|  | | 391833 controls, 6868 severe cases | | Type 2 diabetes | | OR 2.01 (1.87-2.15)p<0.001 | | 44 | |
|  | | 2201 cases | | Diabetes mellitus | | 10.9% | | 45 | |
|  | | 401 controls, 197 cases | | Diabetes mellitus | | 5.7% vs. 8.6%, p=0.183 | | 46 | |
|  | | 3147 controls, 3147 cases | | Diabetes mellitus | | aOR 1.35(1.14-1.59) p<0.001 | | 47 | |
|  | | 140 controls, 140 cases | | Type 2 diabetes | | OR 2.53(1.48-4.26) p<0.001 | | 49 | |
|  | | 300 controls, 304 cases | | Diabetes mellitus | | OR 1.76(1.11-2.80) p=0.015 | | 53 | |
|  | | 661 controls,661 cases | | Type 2 diabetes | | OR 2.11(1.39-3.20) p<0.001 | | 54 | |
|  | | 81 controls,77 cases | | Diabetes mellitus | | OR 1.27(0.59-2.73) p=0.54 | | 555 | |
|  | | 1579037 controls, 46095 cases | | Diabetes mellitus | | OR 1.27, p<0.05 | | 60 | |
|  | | 74987 controls, 16851 cases | | Diabetes mellitus | | aOR 1.33(1.25-1.40), p<0.00001 | | 61 | |
|  | | 48681controls, 16851 cases | | Diabetes mellitus | | aOR 1.33(1.25-1.40), p<0.00001 | | 38 | |
|  | | 76599 controls, 8124 cases | | Type 2 Diabetes | | aHR 1.21(1.01-1.44) (mild)  aHR 1.01(0.81-1.26) (moderate)  aHR 1.64(1.23-2.18) (severe) | | 62 | |
|  | | 143 cases | | Diabetes mellitus | | aPR 2.09(1.16-3.76) (males)  aPR 2.43(1.17-5.07) (females) | | 63 | |
|  | | 581248 controls, 59287 cases | | Diabetes mellitus | | aHR 1.24(1.18-1.31) | | 64 | |
|  | | 20012 subjects | | Dyslipidemia | | aOR 1.73(1.43-2.11) p<0.0001 | | 23 | |
|  | | 1044 controls,581 cases | | Hyperlipidemia | | OR 2.09, p<0.01 | | 27 | |
|  | | 82456 controls, 20614 cases | | Hyperlipidemia | | OR 1.18(1.14-1.22) | | 28 | |
|  | | 101507 controls, 25556 cases | | Hyperlipidemia | | OR 1.26(1.22-1.30) | | 28 | |
|  | | 208187 controls, 48523 cases | | Hyperlipidemia | | aOR 1.04(0.96-1.11) p=0.346 | | 30 | |
|  | | 556995 controls, 127139 mild and 3837 severe cases | | Hyperlipidemia | | OR 3.08(2.93-3.23) (mild) p<0.001  OR 3.18(3.02-3.36) (moderate to severe)p<0.001 | | 33 | |
|  | | 190 cases | | Dyslipidemia | | 25.3% | | 40 | |
|  | | 40 cases | | Dyslipidemia | | 17.5% | | 43 | |
|  | | 391833 controls, 6868 severe cases | | Dyslipidemia | | OR 1.92 (1.82-2.03)p<0.001 | | 44 | |
|  | | 2201 cases | | Dyslipidemia | | 27.5% | | 45 | |
|  | | 3147 controls, 3147 cases | | Dyslipidemia | | aOR 1.29(1.07-1.55) p=0.007 | | 47 | |
|  | | 40650 controls, 2044 mild,1377 moderate & 475 severe cases | | Hyperlipidemia | | aOR 1.11(0.97-1.26) (mild)  aOR 1.16(0.99-1.35) (moderate)  aOR 1.31(1.00-1.71) (severe) | | 51 | |
|  | | 40650 controls, 2044 mild,1377 moderate & 475 severe cases | | Reduced HDL | | aOR 0.99(0.87-1.13) (mild)  aOR 0.94(0.80-1.11) (moderate)  aOR 1.05(0.80-1.39) (severe) | | 51 | |
|  | | 97 controls, 97 cases | | Reduced HDL | | Vs. controls p=0.01 | | 32 | |
|  | | 2385 controls, 71 cases | | Reduced HDL | | aOR 1.63(0.98-2.71) | | 52 | |
|  | | 661 controls,661 cases | | Dyslipidemia | | OR 0.83(0.66-1.03) p=0.08 | | 54 | |
|  | | 95 controls,95 cases | | Reduced HDL | | OR 5.57(2.86-25.71) p<0.001 | | 57 | |
|  | | 1718 controls,859 cases | | Hyperlipidemia | | OR 1.52(1.18-1.94) p=0.0009 | | 58 | |
|  | | 154 controls,151 cases | | Reduced HDL | | OR 1.77(0.97-3.23) | | 59 | |
|  | | 100 controls, 100 cases | | LDL  HDL | | 76.70±31.08 vs.110.95±38.73, p<0.001  47.54±5.82 vs. 43.04±10.67, p<0.001 | | 65 | |
|  | | 4942 controls, 557 cases (females) | | LDL (mmol L-1)  HDL (mmol L-1) | | 3.64±1.0 vs.3.52±1.0, p=0.003  1.66±0.4 vs. 1.59±0.4, p=0.001 | | 66 | |
|  | | 4442 controls, 580 cases(males) | | LDL (mmol L-1)  HDL (mmol L-1) | | 3.57±0.9 vs.3.59±0.9, p=0.50  1.36±0.4 vs. 1.34±0.4, p=0.15 | | 66 | |
|  | | 97 controls, 97 cases | | Metabolic syndrome | | OR 1.80 (1.02-3.23) p=0.04 | | 32 | |
|  | | 48677controls, 16850 cases | | Metabolic syndrome | | aOR 1.30(1.10-1.40) | | 38 | |
|  | | 190 cases | | Metabolic syndrome | | 44.9% | | 40 | |
|  | | 40 cases | | Metabolic syndrome | | 20% | | 43 | |
|  | | 682 controls. 490 cases | | Metabolic syndrome | | 12.8% vs. 10.3%, p=0.200 | | 48 | |
|  | | 140 controls, 140 cases | | Metabolic syndrome | | OR 3.12(1.80-5.45) p<0.001 | | 49 | |
|  | | 163 controls, 244 cases | | Metabolic syndrome | | aOR 2.66(1.58-4.42) | | 50 | |
|  | | 81 controls,77 cases | | Metabolic syndrome | | OR 3.58(1.39-9.21) p=0.008 | | 55 | |
|  | | 120 controls,118 cases | | Metabolic syndrome | | 30% vs. 44.1%. p=0.0251162 | | 56 | |
|  | | 95 controls,95 cases | | Metabolic syndrome | | OR 4.21(1.49-11.86) p=0.004 | | 57 | |
|  | | 1718 controls,859 cases | | Metabolic syndrome | | OR 1.51(1.18-1.94) p=0.001 | | 58 | |
|  | | 154 controls,151 cases | | Metabolic syndrome | | OR 1.74(0.99-3.05) | | 59 | |
|  | | 143 cases | | Metabolic syndrome | | aPR 0.69(0.42-1.12) (males)  aPR 2.84(1.14-2.98) (females) | | 63 | |
|  | | 40 controls. 50 cases | | Metabolic syndrome | | 25% vs. 50%, p=0.01 | | 67 | |
|  | | 334 controls, 338 cases | | Metabolic syndrome | | 20.6% 30.1%, p=0.005 | | 68 | |
|  | | 40 controls, 40 cases | | Metabolic syndrome | | 30% vs. 32.5%, p=0.8094 | | 69 | |
|  | | 303 female and 260 male cases | | Metabolic syndrome | | 60.5% in females vs. 39.4% in males, p<0.05 | | 70 | |
|  | | 30 controls, 30 cases | | Metabolic syndrome | | 40% vs. 60%, p=0.121 | | 71 | |
| ***Seborrheic Dermatitis*** | | | |  | |  | |  | |
|  | | 9246 controls, 9255 cases | | Hypertension | | OR1.13(1.05-1.21) p<0.001 | | 72 | |
|  | | 47 controls, 54 cases | | Hypertension | | Systolic BP 110 vs. 120 mmHg, p=0.016  Diastolic BP 70 vs. 75 mmHg, p=0.029 | | 73 | |
|  | | 31324 controls, 7831 cases | | Hypertension | | 9.55% vs. 14.17%, p<0.001 | | 74 | |
|  | | 31324 controls, 7831 cases | | Stroke | | 1.51% vs. 2.11%, p<0.001 | | 74 | |
|  | | 9246 controls, 9255 cases | | Diabetes mellitus | | 11.0% vs. 12.0%, p=0.036 | | 72 | |
|  | | 31324 controls, 7831 cases | | Diabetes mellitus | | 7.67% vs. 9.69%, p<0.001 | | 74 | |
|  | | 47 controls, 54 cases | | LDL | | 95.3 vs. 117.6 mg/dl, p=0.002 | | 73 | |
|  | | 31324 controls, 7831 cases | | Hyperlipidemia | | 14.45% vs. 20.79%, p<0.001 | | 74 | |
|  | | 36 controls, 47 cases | | Reduced HDL  Metabolic syndrome | | 41.5% vs. 66.0%, p=0.044  8.3% vs. 19.1%, p=0.216 | | 75 | |
|  | | 39 controls, 39 cases | | Visceral adiposity & body mass index | | No significant differences | | 76 | |
|  | | 30 cases | | HDL and LDL | | HDL negatively and LDL positively correlated with disease severity | | 77 | |
|  | | 45 cases | | LDL | | LDL positively correlated with disease severity | | 78 | |
|  | | 50 controls, 53 cases | | Insulin resistance  Metabolic syndrome | | 22.0% vs. 58.49%, p=0.0001  12.0% vs. 22.64%, p=0.155 | | 79 | |
|  | | 31324 controls, 7831 cases | | osteoporosis | | aHR5.95(4.35-8.13) p<0.001 | | 74 | |
| ***Hidradenitis suppurativa*** | | | |  | |  | |  | |
|  | | 1730 controls, 1730 cases | | Hypertension | | aOR 1.84(1.22-2.79) | | 80 | |
|  | | 14851 controls, 326 cases | | Hypertension | | aOR 1.08(0.85-1.38) | | 81 | |
|  | | 222 controls, 243 cases | | Hypertension | | OR 0.8(0.6-1.20) p=0.264 | | 82 | |
|  | | 6412 controls, 3207 cases | | Hypertension | | aOR 1.19(1.03-1.39) p=0.01 | | 83 | |
|  | | 29404 controls, 5964 cases | | Myocardial infarction | | Adjusted IRR 1.57(1.14-2.17) p=0.005 | | 84 | |
|  | | 1421223 controls, 49862 cases | | Myocardial infarction | | aHR 1.21(1.12-1.32) p<0.001 | | 85 | |
|  | | 29404 controls, 5964 cases | | Major vascular events | | Adjusted IRR 1.53(1.27-1.86) p=0.001 | | 84 | |
|  | | 1421223 controls, 49862 cases | | Cardiovascular events | | aHR 1.22(1.14-1.31) p<0.001 | | 85 | |
|  | | 29404 controls, 5964 cases | | Cardiovascular -associated death | | Adjusted IRR 1.95(1.42-2.67) p<0.001 | | 84 | |
|  | | 1730 controls, 1730 cases | | Dyslipidemia | | aOR 4.06(2.54-6.48) | | 81 | |
|  | | 222 controls, 243 cases | | Hyperlipidemia | | OR 2.4(1.6-3.6) p<0.001 | | 82 | |
|  | | 6412 controls, 3207 cases | | Hyperlipidemia | | aOR 1.14(1.02-1.28) p=0.02 | | 83 | |
|  | | 14851 controls, 326 cases | | Reduced HDL | | aOR 1.94(1.52-2.48) | | 81 | |
|  | | 222 controls, 243 cases | | Reduced HDL | | OR 1.2(0.8-1.8) p=0.295 | | 82 | |
|  | | 521 controls, 111 cases | | Reduced HDL | | aOR 1.88(1.02-3.64) p=0.05 | | 86 | |
|  | | 14851 controls, 326 cases | | Metabolic syndrome | | aOR 2.08(1.61-2.69) | | 81 | |
|  | | 6412 controls, 3207 cases | | Metabolic syndrome | | aOR 1.61(1.36-1.89) p<0.001 | | 83 | |
|  | | 521 controls, 111 cases | | Metabolic syndrome | | aOR 1.64(1.25-2.15) p<0.01 | | 86 | |
|  | | 1730 controls, 1730 cases | | Obesity | | aOR 2.09(1.03-4.22) | | 80 | |
|  | | 14851 controls, 326 cases | | Obesity | | aOR 2.58(2.00-3.23) | | 81 | |
|  | | 222 controls, 243 cases | | Obesity | | OR 3.6(2.2-5.6) p<0.001 | | 82 | |
|  | | 6412 controls, 3207 cases | | Obesity | | aOR 1.71(1.53-1.91) p<0.001 | | 83 | |
|  | | 906 controls, 302 cases | | Obesity | | aOR 2.08(1.40-3.08) (BMI 25-29)  aOR4.42(2.82-6.93) (BMI≥30) | | 87 | |
|  | | 45 controls, 15 cases | | BMI | | OR 0.75(0.46-1.22) p=0.24 | | 88 | |
|  | | 1730 controls, 1730 cases | | Diabetes mellitus | | aOR 1.72(1.00-2.96) | | 80 | |
|  | | 14851 controls, 326 cases | | Diabetes mellitus | | aOR 2.44(1.55-3.83) | | 81 | |
|  | | 6412 controls, 3207 cases | | Diabetes mellitus | | aOR 1.41(1.19-1.66) p<0.001 | | 83 | |
|  | | 1252750 controls, 43105 cases | | Type 2 diabetes | | aOR 1.58(1.54-1.62) | | 89 | |
|  | | 29404 controls, 5964 cases | | Stroke | | Adjusted IRR 1.33(1.01-1.76) p=0.04 | | 84 | |
| ***Rosacea*** | | | | | | | | | | |
|  | | 67106 controls, 33553 cases | | Hypertension | | aOR 1.17 (1.12-1.21) p<0.008 | | 90 | |
|  | | 65 controls, 65 cases | | Hypertension | | OR 2.8 (1.1-7.2) p=0.03 | | 91 | |
|  | | 12936 controls, 12936 cases | | Hypertension | | aOR 1.02 (0.78-1.22) p=0.062 | | 92 | |
|  | | 23823 controls, 4948 cases | | Myocardial infarction | | Adjusted IRR 0.75 (0.57-1.00) p=0.047 | | 93 | |
|  | | 4263 controls, 2090 cases | | Cardiovascular events | | aOR 0.89 (0.73-1.09) p=0.2713 | | 19 | |
|  | | 67106 controls, 33553 cases | | Cardiovascular events | | aOR 1.35(1.29-1.41) p<0.008 | | 90 | |
|  | | 26810 controls, 2681 cases | | Cardiovascular events | | aOR 1.20(1.03-1.40) p=0.017 | | 94 | |
|  | | 23823 controls, 4948 cases | | Major cardiovascular events | | Adjusted IRR 0.99 (0.86-1.15) p=0.905 | | 93 | |
|  | | 12936 controls, 12936 cases | | Coronary heart disease | | aOR 0.83 (0.78-0.88) p=0.12 | | 92 | |
|  | | 26810 controls, 2681 cases | | Coronary heart disease | | aOR 1.29(1.05-1.60) p=0.017 | | 94 | |
|  | | 23823 controls, 4948 cases | | Stroke | | Adjusted IRR 1.08 (0.86-1.35) p=0.507 | | 93 | |
|  | | 26810 controls, 2681 cases | | Stroke | | aOR 1.12(0.91-1.37) p=282 | | 94 | |
|  | | 67106 controls, 33553 cases | | Dyslipidemia | | aOR 1.41 (1.36-1.46) p<0.008 | | 90 | |
|  | | 12936 controls, 12936 cases | | Dyslipidemia | | aOR 1.12 (0.84-1.36) p=0.001 | | 92 | |
|  | | 50 controls, 60 cases | | Total blood cholesterol (mg/dl) | | 162.83±30.05 vs. 199.19±36.6, p<0.001 | | 95 | |
|  | | 50 controls, 60 cases | | LDL (mg/dl) | | 101.48±23.47 vs. 121.02±31.54, p=0.001 | | 95 | |
|  | | 50 controls, 47 cases | | LDL (mg/dl) | | 119.84±27.46 vs. 132.96±31.21, p=0.03 | | 96 | |
|  | | 40 controls, 40 cases | | LDL (mg/dl) | | 123.55±33.64 vs. 123.75±40.92, p=0.981 | | 97 | |
|  | | 278 controls, 146 cases | | LDL (mmol/l) | | 3.20±0.77 vs. 3.23±0.78, p=0.725 | | 98 | |
|  | | 100 controls, 100 cases | | LDL (mg/dl) | | 114.84±27.24 vs. 136.42±37.79, p<0.001 | | 99 | |
|  | | 50 controls, 60 cases | | HDL (mg/dl) | | 50.17±8.43 vs. 53.8±14.06, p=0.104 | | 95 | |
|  | | 50 controls, 47 cases | | HDL (mg/dl) | | 59.20±17.22 vs. 58.96±15.75, p=0.837 | | 96 | |
|  | | 40 controls, 40 cases | | HDL (mg/dl) | | 45.92±13.74 vs. 50.42±13.68, p=0.46 | | 97 | |
|  | | 278 controls, 146 cases | | HDL (mmol/l) | | 1.67±0.39 vs. 1.68±0.40, p=0.879 | | 98 | |
|  | | 100 controls, 100 cases | | HDL (mg/dl) | | 52.56±13.56 vs. 51.22±10.67, p=0.509 | | 99 | |
|  | | 100 controls, 100 cases | | Insulin (mIU/ml) | | 6.25±3.57 vs. 8.02±3.87, p<0.001 | | 99 | |
|  | | 50 controls, 47 cases | | Insulin resistance | | 20% vs. 44.7%, p=0.009 | | 96 | |
|  | | 67106 controls, 33553 cases | | Diabetes mellitus | | aOR 1.01 (0.97-1.06) | | 90 | |
|  | | 12936 controls, 12936 cases | | Diabetes mellitus | | aOR 1.11 (1.02-1.19) p=0.010.0 | | 92 | |
|  | | 65 controls, 65 cases | | Metabolic syndrome | | OR 2.4 (1.04-5.4) p=0.04 | | 91 | |
|  | | 50 controls, 47 cases | | Metabolic syndrome | | 22% vs. 34.1%, p=0.186 | | 96 | |
|  | | 1195 controls, 621 cases | | Metabolic diseases | | 21.3% vs. 28.3%, p=0.001 | | 100 | |
| ***Bullous Pemphigoid*** | | | | | | | | | |
|  |  | | 72651487 subjects | | Hypertension | | Propensity OR 1.80(1.71-1.90) p<0.0001 | | 4 | |
|  |  | | 162 controls, 162 cases | | Hypertension | | aOR 0.75(0.45-1.13) p=0.278 | | 101 | |
|  |  | | 168 controls, 218 cases | | Hypertension | | aOR 2.16(1.31-3.73) p=0.002 | | 102 | |
|  |  | | 43 controls, 43 cases | | Hypertension | | OR 0.9(0.4-2.2) p=0.822 | | 103 | |
|  |  | | 72651487 subjects | | Coronary artery disease | | Propensity OR 1.17(1.10-1.24) p<0.0001 | | 4 | |
|  |  | | 168 controls, 218 cases | | Coronary artery disease | | aOR 1.29(0.77-2.15) p=0.32 | | 102 | |
|  |  | | 43 controls, 43 cases | | Coronary artery disease | | OR 0.7(0.3-1.8) p=0.451 | | 103 | |
|  |  | | 72651487 subjects | | Myocardial infarction | | Propensity OR 0.98(0.87-1.10) p=0.7453 | | 4 | |
|  |  | | 168 controls, 218 cases | | Myocardial infarction | | aOR 0.84(0.34-2.08) p=0.71 | | 102 | |
|  |  | | 72651487 subjects | | Cerebrovascular accident | | Propensity OR 0.79(0.84-1.11) p=0.6308 | | 4 | |
|  |  | | 168 controls, 218 cases | | Dementia | | aOR 7.86(2.94-21.03) p<0.001 | | 102 | |
|  |  | | 43 controls, 43 cases | | Dementia | | 0 vs. 20.9%, p=0.002 | | 103 | |
|  |  | | 162 controls, 162 cases | | Hyperlipidemia | | aOR 1.87(1.03-3.40) p=0.040 | | 101 | |
|  |  | | 43 controls, 43 cases | | Dyslipidemia | | OR 0.4(0.1-0.9) p=0.033 | | 103 | |
|  |  | | 72651487 subjects | | Type 2 diabetes | | Propensity OR 1.45(1.24-1.69) p<0.0001 | | 4 | |
|  |  | | 168 controls, 218 cases | | Diabetes mellitus | | aOR 0.97(0.54-1.72) p=0.91 | | 102 | |
|  |  | | 43 controls, 43 cases | | Diabetes mellitus | | OR 1.6(0.7-3.8) p=0.279 | | 103 | |
|  |  | | 162 controls, 162 cases | | Metabolic syndrome | | aOR 2.49(2.04-5.96) p=0.029 | | 101 | |

CI: Confidence interval; OR: odds ratio; aOR: adjusted odds ratio; PR: prevalence ratio; RRR: relative risk ratio; IRR: incidence risk ratios; HR: hazard ratio; aHR: adjusted hazard ratio; BP: blood pressure; LDL: Low density lipoprotein; HDL: high density lipoprotein; BMI: body mass index.

**References**

1. Silverberg JI. Association between adult atopic dermatitis, cardiovascular disease, and increased heart attacks in three population-based studies. Allergy. 2015;70(10):1300-8.
2. Smith B, Engel P, Javadi SS, Han G, Wu JJ. Association between atopic dermatitis and cardiovascular disease in a nationally representative United States population. J Am Acad Dermatol. 2023;89(3):610-613.
3. Su VY, Chen TJ, Yeh CM, et al. Atopic dermatitis and risk of ischemic stroke: a nationwide population-based study. Ann Med. 2014;46(2):84-9.
4. Kwa MC, Silverberg JI. Association Between Inflammatory Skin Disease and Cardiovascular and Cerebrovascular Co-Morbidities in US Adults: Analysis of Nationwide Inpatient Sample Data. Am J Clin Dermatol. 2017;18(6):813-823.
5. Roh YS, Huang AH, Sutaria N, et al.. Real-world comorbidities of atopic dermatitis in the US adult ambulatory population. J Am Acad Dermatol. 2022;86(4):835-845.
6. Silverwood RJ, Forbes HJ, Abuabara K, et al. Severe and predominantly active atopic eczema in adulthood and long term risk of cardiovascular disease: population based cohort study. BMJ. 2018;361:k1786.
7. Ivert LU, Johansson EK, Dal H, Lindelöf B, Wahlgren CF, Bradley M. Association Between Atopic Dermatitis and Cardiovascular Disease: A Nationwide Register-based Case-control Study from Sweden. Acta Derm Venereol. 2019;99(10):865-870.
8. Jung HJ, Lee DH, Park MY, Ahn J. Cardiovascular comorbidities of atopic dermatitis: using National Health Insurance data in Korea. Allergy Asthma Clin Immunol. 2021;17(1):94.
9. Lee SW, Kim H, Byun Y, et al. Incidence of Cardiovascular Disease After Atopic Dermatitis Development: A Nationwide, Population-Based Study. Allergy Asthma Immunol Res. 2023;15(2):231-245.
10. Hewitt N, Fang W, Kolodney MS. A cross-sectional comparison of eczema and psoriasis patients with regard to cardiovascular disease and risk factors. J Eur Acad Dermatol Venereol. 2023;37(7):e939-e940.
11. Andersen YMF, Egeberg A, Gislason GH, Hansen PR, Skov L, Thyssen JP. Risk of myocardial infarction, ischemic stroke, and cardiovascular death in patients with atopic dermatitis. J Allergy Clin Immunol. 2016;138(1):310-312.e3.
12. Drucker AM, Qureshi AA, Dummer TJB, Parker L, Li WQ. Atopic dermatitis and risk of hypertension, type 2 diabetes, myocardial infarction and stroke in a cross-sectional analysis from the Canadian Partnership for Tomorrow Project. Br J Dermatol. 2017;177(4):1043-1051.
13. Egeberg A, Andersen YM, Gislason GH, Skov L, Thyssen JP. Prevalence of comorbidity and associated risk factors in adults with atopic dermatitis. Allergy. 2017;72(5):783-791.
14. Riis JL, Vestergaard C, Hjuler KF, et al. Hospital-diagnosed atopic dermatitis and long-term risk of myocardial infarction: a population-based follow-up study. BMJ Open. 2016;6(11):e011870.
15. Wan J, Fuxench ZCC, Wang S, et al. Incidence of Cardiovascular Disease and Venous Thromboembolism in Patients With Atopic Dermatitis. J Allergy Clin Immunol Pract. 2023:S2213-2198(23)00905-4.
16. Woo YR, Cho M, Do Han K, Cho SH, Lee JH. Atopic Dermatitis and the Risk of Myocardial Infarction and All-Cause Mortality: A Nationwide Population-Based Cohort Study. Allergy Asthma Immunol Res. 2023;15:e51.
17. Silverberg JI, Gelfand JM, Margolis DJ, et al. Association of atopic dermatitis with allergic, autoimmune, and cardiovascular comorbidities in US adults. Ann Allergy Asthma Immunol. 2018;121(5):604-612.e3.
18. Wu JJ, Amand C, No DJ, et al. The Use of Real-World Data to Evaluate the Association Between Atopic Dermatitis and Cardiovascular Disease: A Retrospective Claims Analysis. Dermatol Ther (Heidelb). 2021;11(5):1707-1715.
19. Marshall VD, Moustafa F, Hawkins SD, Balkrishnan R, Feldman SR. Cardiovascular Disease Outcomes Associated with Three Major Inflammatory Dermatologic Diseases: A Propensity-Matched Case Control Study. Dermatol Ther (Heidelb). 2016;6(4):649-658.
20. Kok WL, Yew YW, Thng TG. Comorbidities Associated with Severity of Atopic Dermatitis in Young Adult Males: A National Cohort Study. Acta Derm Venereol. 2019;99(7):652-656.
21. Wu CY, Lu YY, Lu CC, Su YF, Tsai TH, Wu CH. Osteoporosis in adult patients with atopic dermatitis: A nationwide population-based study. PLoS One. 2017;12(2):e0171667.
22. Shalom G, Dreiher J, Kridin K, et al. Atopic dermatitis and the metabolic syndrome: a cross-sectional study of 116 816 patients. J Eur Acad Dermatol Venereol. 2019;33(9):1762-1767.
23. Smirnova J, Montgomery S, Lindberg M, Svensson Å, von Kobyletzki L. Associations of self-reported atopic dermatitis with comorbid conditions in adults: a population-based cross-sectional study. BMC Dermatol. 2020;20(1):23.
24. Richard MA, Sei JF, Philippe C, Taieb C, Joly P, Ezzedine K. Prevalence of comorbidities in atopic dermatitis and psoriasis in the French population. Ann Dermatol Venereol. 2021;148(1):28-33.
25. Won Lee S, Park J, Kim H, et al. Risk of type 2 diabetes mellitus in adult patients with atopic dermatitis. Diabetes Res Clin Pract. 2023:110883.
26. Lee JH, Jung HM, Han KD, et al. Association Between Metabolic Syndrome and Atopic Dermatitis in Korean Adults. Acta Derm Venereol. 2017;97(1):77-80.
27. Sommer DM, Jenisch S, Suchan M, Christophers E, Weichenthal M. Increased prevalence of the metabolic syndrome in patients with moderate to severe psoriasis. Arch Dermatol Res. 2006;298(7):321-8.
28. Kimball AB, Robinson D Jr, Wu Y, et al. Cardiovascular disease and risk factors among psoriasis patients in two US healthcare databases, 2001-2002. Dermatology. 2008;217(1):27-37.
29. Ahlehoff O, Gislason GH, Charlot M, et al. Psoriasis is associated with clinically significant cardiovascular risk: a Danish nationwide cohort study. J Intern Med. 2011;270(2):147-57.
30. Parisi R, Rutter MK, Lunt M, et al. Identification and Management of Psoriasis Associated ComorbidiTy (IMPACT) project team. Psoriasis and the Risk of Major Cardiovascular Events: Cohort Study Using the Clinical Practice Research Datalink. J Invest Dermatol. 2015;135(9):2189-2197.
31. Jung KJ, Kim TG, Lee JW, et al. Increased risk of atherosclerotic cardiovascular disease among patients with psoriasis in Korea: A 15-year nationwide population-based cohort study. J Dermatol. 2019;46(10):859-866.
32. Ferdinando LB, Fukumoto PK, Sanches S, Fabricio LHZ, Skare TL. Metabolic syndrome and psoriasis: a study in 97 patients. Rev Assoc Med Bras (1992). 2018;64(4):368-373.
33. Gelfand JM, Neimann AL, Shin DB, Wang X, Margolis DJ, Troxel AB. Risk of myocardial infarction in patients with psoriasis. JAMA. 2006;296(14):1735-41.
34. Li WQ, Han JL, Manson JE, et al. Psoriasis and risk of nonfatal cardiovascular disease in U.S. women: a cohort study. Br J Dermatol. 2012;166(4):811-8.
35. Lai YC, Yew YW. Psoriasis as an Independent Risk Factor for Cardiovascular Disease: An Epidemiologic Analysis Using a National Database. J Cutan Med Surg. 2016;20(4):327-33.
36. Ogdie A, Yu Y, Haynes K, et al. Risk of major cardiovascular events in patients with psoriatic arthritis, psoriasis and rheumatoid arthritis: a population-based cohort study. Ann Rheum Dis. 2015 ;74(2):326-32.
37. Shapiro J, Cohen AD, Weitzman D, Tal R, David M. Psoriasis and cardiovascular risk factors: a case-control study on inpatients comparing psoriasis to dermatitis. J Am Acad Dermatol. 2012;66(2):252-8.
38. Cohen AD, Sherf M, Vidavsky L, Vardy DA, Shapiro J, Meyerovitch J. Association between psoriasis and the metabolic syndrome. A cross-sectional study. Dermatology. 2008;216(2):152-5.
39. Brauchli YB, Jick SS, Meier CR. Psoriasis and the risk of incident diabetes mellitus: a population-based study. Br J Dermatol. 2008;159(6):1331-7.
40. Kampe T, Dorko E, Rimárová K, et al.. Prevalence of cardiovascular risk factors in patients with psoriasis. Cent Eur J Public Health. 2022;30(Supplement):S05-S10.
41. Neimann AL, Shin DB, Wang X, Margolis DJ, Troxel AB, Gelfand JM. Prevalence of cardiovascular risk factors in patients with psoriasis. J Am Acad Dermatol. 2006;55(5):829-35.
42. Baeta IG, Bittencourt FV, Gontijo B, Goulart EM. Comorbidities and cardiovascular risk factors in patients with psoriasis. An Bras Dermatol. 2014;89(5):735-44.
43. Argote A, Mora-Hernández O, Milena Aponte L, et al. Cardiovascular Risk Factors and Carotid Intima-Media Thickness in a Colombian Population With Psoriasis. Actas Dermosifiliogr. 2017;108(8):738-745.
44. Fernández-Armenteros JM, Gómez-Arbonés X, Buti-Soler M, et al. Psoriasis, metabolic syndrome and cardiovascular risk factors. A population-based study. J Eur Acad Dermatol Venereol. 2019;33(1):128-135.
45. Phan C, Sigal ML, Lhafa M, et al. GEM Resopso. Metabolic comorbidities and hypertension in psoriasis patients in France. Comparisons with French national databases. Ann Dermatol Venereol. 2016;143(4):264-74.
46. Choi WJ, Park EJ, Kwon IH, Kim KH, Kim KJ. Association between Psoriasis and Cardiovascular Risk Factors in Korean Patients. Ann Dermatol. 2010;22(3):300-6.
47. Schmitt J, Ford DE. Psoriasis is independently associated with psychiatric morbidity and adverse cardiovascular risk factors, but not with cardiovascular events in a population-based sample. J Eur Acad Dermatol Venereol. 2010;24(8):885-92.
48. Kim GW, Park HJ, Kim HS, et al. Analysis of cardiovascular risk factors and metabolic syndrome in korean patients with psoriasis. Ann Dermatol. 2012;24(1):11-5.
49. Kothiwala SK, Khanna N, Tandon N, et al. Prevalence of metabolic syndrome and cardiovascular changes in patients with chronic plaque psoriasis and their correlation with disease severity: A hospital-based cross-sectional study. Indian J Dermatol Venereol Leprol. 2016;82(5):510-8.
50. Milčić D, Janković S, Vesić S, et al. Prevalence of metabolic syndrome in patients with psoriasis: a hospital-based cross-sectional study. An Bras Dermatol. 2017;92(1):46-51.
51. Langan SM, Seminara NM, Shin DB, et al. Prevalence of metabolic syndrome in patients with psoriasis: a population-based study in the United Kingdom. J Invest Dermatol. 2012;132(3 Pt 1):556-62.
52. Love TJ, Qureshi AA, Karlson EW, Gelfand JM, Choi HK. Prevalence of the metabolic syndrome in psoriasis: results from the National Health and Nutrition Examination Survey, 2003-2006. Arch Dermatol. 2011;147(4):419-24.
53. Ghiasi M, Nouri M, Abbasi A, Hatami P, Abbasi MA, Nourijelyani K. Psoriasis and increased prevalence of hypertension and diabetes mellitus. Indian J Dermatol. 2011;56(5):533-6.
54. Armesto S, Santos-Juanes J, Galache-Osuna C, Martinez-Camblor P, Coto E, Coto-Segura P. Psoriasis and type 2 diabetes risk among psoriatic patients in a Spanish population. Australas J Dermatol. 2012;53(2):128-30
55. Chen YJ, Wu CY, Shen JL, et al. Psoriasis independently associated with hyperleptinemia contributing to metabolic syndrome. Arch Dermatol. 2008;144(12):1571-5
56. Madanagobalane S, Anandan S. Prevalence of metabolic syndrome in South Indian patients with psoriasis vulgaris and the relation between disease severity and metabolic syndrome: a hospital-based case-control study. Indian J Dermatol. 2012;57(5):353-7.
57. Salunke AS, Nagargoje MV, Belgaumkar VA, Tolat SN, Chavan RB. Association of Metabolic Syndrome in Chronic Plaque Psoriasis Patients and their Correlation with Disease Severity, Duration and Age: A Case Control Study from Western Maharashtra. J Clin Diagn Res. 2017;11(8):WC06-WC10.
58. Gui XY, Yu XL, Jin HZ, Zuo YG, Wu C. Prevalence of metabolic syndrome in Chinese psoriasis patients: A hospital-based cross-sectional study. J Diabetes Investig. 2018;9(1):39-43.
59. Takahashi H, Takahashi I, Honma M, Ishida-Yamamoto A, Iizuka H. Prevalence of metabolic syndrome in Japanese psoriasis patients. J Dermatol Sci. 2010;57(2):143-4.
60. Shapiro J, Cohen AD, David M, et al. The association between psoriasis, diabetes mellitus, and atherosclerosis in Israel: a case-control study. J Am Acad Dermatol. 2007;56(4):629-34.
61. Cohen AD, Dreiher J, Shapiro Y, et al. Psoriasis and diabetes: a population-based cross-sectional study. J Eur Acad Dermatol Venereol. 2008;22(5):585-9.
62. Wan MT, Shin DB, Hubbard RA, Noe MH, Mehta NN, Gelfand JM. Psoriasis and the risk of diabetes: A prospective population-based cohort study. J Am Acad Dermatol. 2018;78(2):315-322.e1.
63. Sondermann W, Djeudeu Deudjui DA, Körber A, et al. Psoriasis, cardiovascular risk factors and metabolic disorders: sex-specific findings of a population-based study. J Eur Acad Dermatol Venereol. 2020;34(4):779-786.
64. Dubreuil M, Rho YH, Man A, et al. Diabetes incidence in psoriatic arthritis, psoriasis and rheumatoid arthritis: a UK population-based cohort study. Rheumatology (Oxford). 2014;53(2):346-52.
65. Singh SK, Tripathi R. Evaluation of the Association of Metabolic Syndrome with Psoriasis and its Severity: A Cross-sectional Study. Indian J Dermatol. 2020;65(3):243-244.
66. Danielsen K, Wilsgaard T, Olsen AO, et al. Elevated odds of metabolic syndrome in psoriasis: a population-based study of age and sex differences. Br J Dermatol. 2015;172(2):419-27.
67. Akcali C, Buyukcelik B, Kirtak N, Inaloz S. Clinical and laboratory parameters associated with metabolic syndrome in Turkish patients with psoriasis. J Int Med Res. 2014;42(2):386-94.
68. Gisondi P, Tessari G, Conti A, et al. Prevalence of metabolic syndrome in patients with psoriasis: a hospital-based case-control study. Br J Dermatol. 2007;157(1):68-73.
69. Lakshmi S, Nath AK, Udayashankar C. Metabolic syndrome in patients with psoriasis: A comparative study. Indian Dermatol Online J. 2014;5(2):132-7.
70. Adışen E, Uzun S, Erduran F, Gürer MA. Prevalence of smoking, alcohol consumption and metabolic syndrome in patients with psoriasis. An Bras Dermatol. 2018;93(2):205-211.
71. Praveenkumar U, Ganguly S, Ray L, Nanda SK, Kuruvila S. Prevalence of Metabolic Syndrome in Psoriasis Patients and its Relation to Disease Duration: A Hospital Based Case-Control Study. J Clin Diagn Res. 2016;10(2):WC01-5.
72. Linder D, Dreiher J, Zampetti A, Sampogna F, Cohen AD. Seborrheic dermatitis and hypertension in adults: a cross-sectional study. J Eur Acad Dermatol Venereol. 2014;28(11):1450-5.
73. Akbaş A, Kılınç F, Şener S, Hayran Y. Investigation of the relationship between seborrheic dermatitis and metabolic syndrome parameters. J Cosmet Dermatol. 2022;21(11):6079-6085.
74. Lu YY, Lu CC, Tsai CY, et al. Impact of seborrheic dermatitis on osteoporosis risk: A population-based cohort study. J Dermatol. 2022;49(12):1291-1298.
75. Imamoglu B, Hayta SB, Guner R, Akyol M, Ozcelik S. Metabolic syndrome may be an important comorbidity in patients with seborrheic dermatitis. Arch Med Sci Atheroscler Dis. 2016;1(1):e158-e161.
76. Ozgul A, Altunisik N, Turkmen D, Sener S. The relationship between seborrheic dermatitis and body composition parameters. North Clin Istanb. 2023;10(2):271-276.
77. Sharmila P, Thakare V, Dubey L, Menon A, Sharma H, Tetarbe T. A Prospective Observational Study to analyze the association of Lipid Profile abnormality with disease severity in Seborrheic Dermatitis patients. Asian J Pharm Clin Res. 2022; 15(7):100-102.
78. Molodykh KY, Araviiskaia ER, Sokolovskiy EV. The interrelation of seborrheic dermatitis with facial skin lesions with metabolic syndrome and diabetes mellitus. Russian J Skin Vener Dis. 2021; 24(4): 335-345.
79. Savaş Erdoğan S, Falay Gür T, Özkur E, Doğan B. Insulin Resistance and Metabolic Syndrome in Patients with Seborrheic Dermatitis: A Case-Control Study. Metab Syndr Relat Disord. 2022;20(1):50-56.
80. Shlyankevich J, Chen AJ, Kim GE, Kimball AB. Hidradenitis suppurativa is a systemic disease with substantial comorbidity burden: a chart-verified case-control analysis. J Am Acad Dermatol. 2014;71(6):1144-50.
81. Miller IM, Ellervik C, Vinding GR, et al. Association of metabolic syndrome and hidradenitis suppurativa. JAMA Dermatol. 2014;150(12):1273-80.
82. Gold DA, Reeder VJ, Mahan MG, Hamzavi IH. The prevalence of metabolic syndrome in patients with hidradenitis suppurativa. J Am Acad Dermatol. 2014;70(4):699-703.
83. Shalom G, Freud T, Harman-Boehm I, Polishchuk I, Cohen AD. Hidradenitis suppurativa and metabolic syndrome: a comparative cross-sectional study of 3207 patients. Br J Dermatol. 2015;173(2):464-70.
84. Egeberg A, Gislason GH, Hansen PR. Risk of Major Adverse Cardiovascular Events and All-Cause Mortality in Patients With Hidradenitis Suppurativa. JAMA Dermatol. 2016;152(4):429-34.
85. Reddy S, Strunk A, Jemec GBE, Garg A. Incidence of Myocardial Infarction and Cerebrovascular Accident in Patients With Hidradenitis Suppurativa. JAMA Dermatol. 2020 ;156(1):65-71.
86. Mintoff D, Agius R, Fava S, Pace NP. Investigating Adiposity-Related Metabolic Health Phenotypes in Patients with Hidradenitis Suppurativa: A Cross-Sectional Study. J Clin Med. 2023;12(14):4847.
87. Revuz JE, Canoui-Poitrine F, Wolkenstein P, et al. Prevalence and factors associated with hidradenitis suppurativa: results from two case-control studies. J Am Acad Dermatol. 2008;59(4):596-601.
88. Schmitt JV, Bombonatto G, Martin M, Miot HA. Risk factors for hidradenitis suppurativa: a pilot study. An Bras Dermatol. 2012;87(6):936-8.
89. Garg A, Birabaharan M, Strunk A. Prevalence of type 2 diabetes mellitus among patients with hidradenitis suppurativa in the United States. J Am Acad Dermatol. 2018;79(1):71-76.
90. Hua TC, Chung PI, Chen YJ, et al. Cardiovascular comorbidities in patients with rosacea: A nationwide case-control study from Taiwan. J Am Acad Dermatol. 2015;73(2):249-54.
91. Rainer BM, Fischer AH, Luz Felipe da Silva D, Kang S, Chien AL. Rosacea is associated with chronic systemic diseases in a skin severity-dependent manner: results of a case-control study. J Am Acad Dermatol. 2015;73(4):604-8.
92. Woo YR, Kim HS, Lee SH, et al. Systemic Comorbidities in Korean Patients with Rosacea: Results from a Multi-Institutional Case-Control Study. J Clin Med. 2020;9(10):3336.
93. Egeberg A, Hansen PR, Gislason GH, Thyssen JP. Assessment of the risk of cardiovascular disease in patients with rosacea. J Am Acad Dermatol. 2016;75(2):336-9.
94. Choi D, Choi S, Choi S, Park SM, Yoon HS. Association of Rosacea With Cardiovascular Disease: A Retrospective Cohort Study. J Am Heart Assoc. 2021;10(19):e020671.
95. Duman N, Ersoy Evans S, Atakan N. Rosacea and cardiovascular risk factors: a case control study. J Eur Acad Dermatol Venereol. 2014;28(9):1165-9.
96. Akin Belli A, Ozbas Gok S, Akbaba G, Etgu F, Dogan G. The relationship between rosacea and insulin resistance and metabolic syndrome. Eur J Dermatol. 2016;26(3):260-4.
97. Dirim YC, Guner RY, Tosun M, Akyol M, Turgut I. Evaluation of cardiovascular risk in people with rosacea: A prospective study. Med Science 2022;11(1):331-4.
98. Sinikumpu S-P, Jokelainen J, Auvinen J, et al. Increased Risk of Cardiovascular Diseases in Female Rosacea Patients: A Nested Case-control Study. Acta Derm Venereol [Internet]. 2019;99(7):705-6.
99. Ozbagcivan O, Ozturk T, Akarsu S, IlknurcT, Fetil E. Evaluation of metabolic syndrome and its components in patients with rosacea: a cross-sectional, case-control study. Hong Kong J. Dermatol. Venereol. 2020; 28:55-62
100. Aksoy B, Ekiz Ö, Unal E, et al. Systemic comorbidities associated with rosacea: a multicentric retrospective observational study. Int J Dermatol. 2019;58(6):722-728.
101. Zhang B, Chen X, Liu Y, Chen F, Yang N, Li L. Relationship between bullous pemphigoid and metabolic syndrome: a 12-year case-control study conducted in China. Ther Adv Chronic Dis. 2022;13:20406223221130707.
102. Kalińska-Bienias A, Kowalczyk E, Jagielski P, Bienias P, Kowalewski C, Woźniak K. The association between neurological diseases, malignancies and cardiovascular comorbidities among patients with bullous pemphigoid: Case-control study in a specialized Polish center. Adv Clin Exp Med. 2019;28(5):637-642.
103. Kwan Z, Lai YN, Ch'ng CC, et al. The Association Between Bullous Pemphigoid and Neurological Disorders in A Selected Malaysian Population. Med J Malaysia. 2015;70(2):81-5.
